# Supplementary material
Source: Springer Nature journal article supplement (https://www.springermedizin.de/resource/supplementary/13052_2013_343_MOESM1_ESM.pdf/9671916)
Supplement: MOESM1 [file 9671916]

**135** residents were eligible for the JPO project between 2006 and 2012

**22 (16%)** declared interest in joining the JPO

**21** attended the preparatory course

**14 (10%)** completed the ICH elective

1 dropped out because of feelings of inadequacy

7 were excluded for a variety of contingent reasons
